# Supplementary material
Source: Springer Nature journal article supplement (https://www.springermedizin.de/resource/supplementary/12958_2012_1011_MOESM1_ESM.pdf/9566590)
Supplement: MOESM1 [file 9566590]

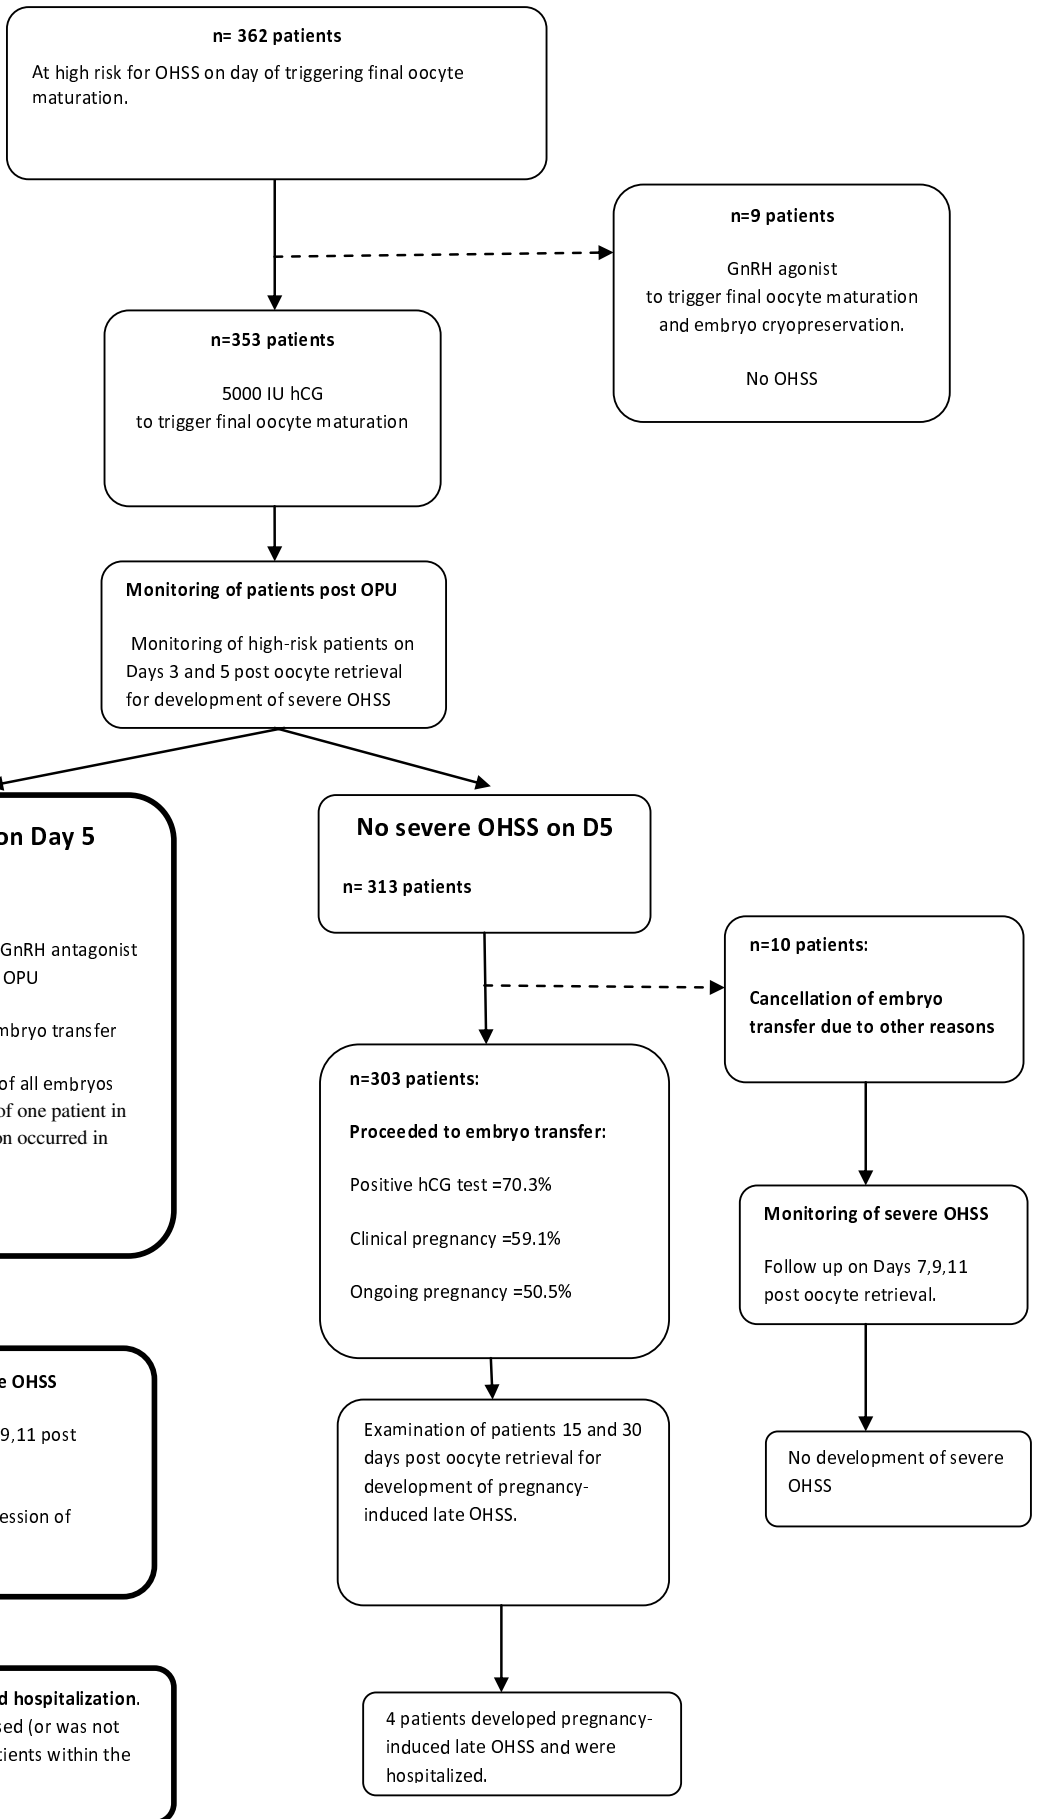

**n= 362 patients**

At high risk for OHSS on day of triggering final oocyte maturation.

**n=9 patients**

GnRH agonist  
to trigger final oocyte maturation  
and embryo cryopreservation.

No OHSS

**n=353 patients**

5000 IU hCG  
to trigger final oocyte maturation

**Monitoring of patients post OPU**

Monitoring of high-risk patients on  
Days 3 and 5 post oocyte retrieval  
for development of severe OHSS

**Severe OHSS on Day 5**

**n=40 patients**

- Administration of GnRH antagonist from D5 to D8 post OPU
- Cancellation of embryo transfer
- Cryopreservation of all embryos with the exception of one patient in whom contamination occurred in embryo culture

**No severe OHSS on D5**

**n= 313 patients**

**n=10 patients:**

Cancellation of embryo  
transfer due to other reasons

**n=303 patients:**

**Proceeded to embryo transfer:**

- Positive hCG test =70.3%
- Clinical pregnancy =59.1%
- Ongoing pregnancy =50.5%

**Monitoring of severe OHSS**

Follow up on Days 7,9,11  
post oocyte retrieval.

No development of severe  
OHSS

**Monitoring of severe OHSS**

Follow up on Days 7,9,11 post  
oocyte retrieval.

Confirmation of regression of  
severe OHSS.

Examination of patients 15 and 30  
days post oocyte retrieval for  
development of pregnancy-  
induced late OHSS.

4 patients developed pregnancy-  
induced late OHSS and were  
hospitalized.

**No patients required hospitalization.**  
Severe OHSS regressed (or was not  
present) in all 40 patients within the  
monitoring period.
